# Supplementary material
Source: publisher site journal article supplement (https://www.dovepress.com/get_supplementary_file.php?f=304685.docx)
Supplement: Supplementary file 1 [file get_supplementary_file.php]

Table 1S. Relative abundance of dominant bacterial taxa in stool of infants with and without AD

| Taxonomy | Abundance  ( mean ± SD%)) | Abundance  ( mean ± SD%)) | p-value |
| --- | --- | --- | --- |
| **Phylum** | Non-AD group(N=25) | AD group(N=20) |  |
| Firmicutes | 59.62 ± 33.74 | 59.16 ± 33.69 | 0.964 |
| Proteobacteria | 25.85 ± 30.66 | 25.65 ± 31.22 | 0.983 |
| Bacteroidetes | 11.87 ± 21.73 | 12.64 ± 23.34 | 0.911 |
| unidentified_Bacteria | 0.01±0.03 | 2.05±9.17 | 0.332 |
| Verrucomicrobia | 1.03±5.17 | 0.17±0.68 | 0.415 |
| Actinobacteria | 1.59±4.69 | 0.30±0.55 | 0.183 |
| Fusobacteria | 0.01±0.03 | 0.04±0.13 | 0.338 |
| **Families** |  |  |  |
| Streptococcaceae | 28.86 ± 34.22 | 11.60 ± 22.50 | 0.048 |
| Enterobacteriaceae | 25.38 ± 30.71 | 24.41 ± 31.61 | 0.918 |
| Bacteroidaceae | 10.53 ± 21.43 | 12.24 ± 22.72 | 0.798 |
| Enterococcaceae | 2.69 ± 10.56 | 11.98 ± 21.02 | 0.083 |
| Veillonellaceae | 7.78 ± 15.82 | 1.87 ± 4.55 | 0.086 |
| unidentified_Clostridiales | 2.26 ± 6.26 | 4.68 ± 11.97 | 0.420 |
| Staphylococcaceae | 3.63 ± 10.96 | 0.56 ± 1.54 | 0.177 |
| Campylobacteraceae | 0.01±0.03 | 1.96±8.78 | 0.332 |
| Peptostreptococcaceae | 0.12 ± 0.37 | 1.97 ± 8.71 | 0.353 |
| Lachnospiraceae | 2.22 ± 7.22 | 3.24 ± 9.54 | 0.693 |
| **Genus** |  |  |  |
| *Streptococcus* | 28.86 ± 34.22 | 11.60 ± 22.50 | 0.048 |
| unidentified_Enterobacteriaceae | 12.69 ± 21.53 | 18.35 ± 25.84 | 0.438 |
| *Klebsiella* | 9.64 ± 21.56 | 5.12 ± 13.89 | 0.400 |
| *Bacteroides* | 10.53 ± 21.43 | 12.24 ± 22.72 | 0.798 |
| *Enterococcus* | 2.69 ± 10.56 | 11.98 ± 21.02 | 0.083 |
| *Citrobacter* | 2.59 ± 12.90 | 0.01 ± 0.02 | 0.327 |
| *Veillonella* | 6.81 ± 15.52 | 1.87 ± 4.55 | 0.141 |
| unidentified_Clostridiales | 2.22 ± 6.25 | 4.67 ± 11.97 | 0.415 |
| *Staphylococcus* | 3.63 ± 10.96 | 0.56 ± 1.54 | 0.177 |
| *Campylobacter* | 0.01±0.03 | 1.96±8.78 | 0.332 |
| **Species** |  |  |  |
| *Escherichia_coli* | 12.69 ±21.53 | 18.34 ± 25.84 | 0.438 |
| *Streptococcus_gallolyticus_subsp_pasteurianus* | 10.59 ±25.37 | 1.21 ± 4.57 | 0.082 |
| *Klebsiella_pneumoniae* | 9.62 ± 21.50 | 5.12 ±13.89 | 0.401 |
| *Bacteroides_fragilis* | 5.46 ± 16.92 | 6.34 ±19.23 | 0.872 |
| *Enterococcus_faecium* | 2.09 ± 10.03 | 5.95 ±18.16 | 0.401 |
| *Citrobacter_freundii* | 2.59 ± 12.90 | 0.01 ± 0.02 | 0.327 |
| *Bacteroides_caccae* | 2.56 ± 12.49 | 1.46 ± 6.35 | 0.705 |
| *Enterococcus_faecalis* | 0.54 ± 1.60 | 5.99 ± 13.01 | 0.078 |

**Abbreviations:** AD, atopic dermatitis; SD, standard deviation
